# Supplementary material
Source: PubMed Central journal article supplement (PMC8807341)
Supplement: vdab192_suppl_supplementary_table_s1.pdf [file vdab192_suppl_supplementary_table_s1.pdf]

**Supplementary Table 1** Glioblastoma cancer cell line mappings among CCLE, ChEMBL, and CTRP.

| CCLE      | ChEMBL    | CTRP      |
|-----------|-----------|-----------|
| 42MGBA    |           | 42MGBA    |
| 8MGBA     | 8MGBA     | 8MGBA     |
| A1207     |           |           |
| A172      | A172      | A172      |
| AM38      | AM38      | AM38      |
| CAS1      | CAS1      | CAS1      |
| CCFSTTG1  |           | CCFSTTG1  |
| DBTRG05MG | DBTRG05MG | DBTRG05MG |
| DKMG      | DKMG      | DKMG      |
| GAMG      | GAMG      | GAMG      |
| GB1       | GB1       | GB1       |
| GMS10     | GMS10     | GMS10     |
| KALS1     | KALS1     | KALS1     |
| KNS42     | KNS42     | KNS42     |
| KNS81     |           | KNS81     |
| LN18      |           | LN18      |
| LN215     |           |           |
| LN229     |           | LN229     |
| LN340     |           |           |
| LN382     |           |           |
| LN428     |           |           |
| LN464     |           |           |
| LNZ308    |           |           |
| M059K     |           | M059K     |
| NMCG1     |           | NMCG1     |
| SF126     | SF126     | SF126     |
| SF172     |           |           |
| SF295     | SF295     | SF295     |
| SNB75     | SNB75     |           |
| SNU1105   |           | SNU1105   |
| SNU201    |           | SNU201    |
| SNU466    |           | SNU466    |
| SNU489    |           | SNU489    |
| SNU626    |           | SNU626    |

|       |       |       |
|-------|-------|-------|
| T98G  | T98G  | T98G  |
| U178  |       |       |
| U343  |       |       |
| U87MG | U87MG | U87MG |
| YH13  | YH13  | YH13  |
| YKG1  | YKG1  | YKG1  |

CCLE, Cancer Cell Line Encyclopedia; ChEMBL, a chemical database of bioactive molecules maintained by the European Bioinformatics Institute of the European Molecular Biology Laboratory; CTRP, The Cancer Therapeutics Response Portal
