# Supplementary material
Source: PubMed Central journal article supplement (PMC8807341)
Supplement: vdab192_suppl_supplementary_table_s2.pdf [file vdab192_suppl_supplementary_table_s2.pdf]

**Supplementary Table 2** List of compounds and their IC50 data on glioblastoma cell lines (S1) from ChEMBL.

| pert_iname      | Standard Value IC50 | Activity  |
|-----------------|---------------------|-----------|
| A-443644        | 248.2               | Effective |
| AZD-8055        | 1750.77             | Effective |
| BI-2536         | 188.24              | Effective |
| BMS-754807      | 1527.21             | Effective |
| bortezomib      | 0.925               | Effective |
| BX-795          | 3714.94             | Effective |
| camptothecin    | 12.76               | Effective |
| CGP-60474       | 130.2               | Effective |
| cytarabine      | 2181.22             | Effective |
| dasatinib       | 354.1               | Effective |
| doxorubicin     | 323.02              | Effective |
| elesclomol      | 22.52               | Effective |
| entinostat      | 3035.13             | Effective |
| epothilone      | 3.915               | Effective |
| etoposide       | 8732.725            | Effective |
| FH-535          | 9111.22             | Effective |
| floxuridine     | 5570                | Effective |
| foretinib       | 960                 | Effective |
| GDC-0941        | 4885.57             | Effective |
| gemcitabine     | 37.24               | Effective |
| GW-843682X      | 97.86               | Effective |
| MG-132          | 3242.62             | Effective |
| midostaurin     | 659.03              | Effective |
| narciclasine    | 48                  | Effective |
| NVP-AUY922      | 30.275              | Effective |
| NVP-BEZ235      | 69.31               | Effective |
| NVP-TAE684      | 2654.14             | Effective |
| palbociclib     | 9865.075            | Effective |
| PD-0325901      | 1843.45             | Effective |
| podophyllotoxin | 5690                | Effective |
| ponatinib       | 1862.66             | Effective |
| saracatinib     | 3650                | Effective |
| sirolimus       | 581.52              | Effective |
| tanespimycin    | 117.81              | Effective |
| thapsigargin    | 14.81               | Effective |
| torin-1         | 63.41               | Effective |
| trifluoperazine | 9900                | Effective |
| TW-37           | 443.26              | Effective |

|                   |          |             |
|-------------------|----------|-------------|
| vinblastine       | 15.045   | Effective   |
| vorinostat        | 4428.19  | Effective   |
| ZM-447439         | 9769.315 | Ineffective |
| afatinib          | 25724.69 | Ineffective |
| AKT-inhibitor-1-2 | 28588.94 | Ineffective |
| axitinib          | 31134.88 | Ineffective |
| AZ-628            | 17761.21 | Ineffective |
| AZD-6482          | 10791.28 | Ineffective |
| betulinic-acid    | 22000    | Ineffective |
| bicalutamide      | 71901.92 | Ineffective |
| bosutinib         | 30754.45 | Ineffective |
| CHIR-99021        | 79955.32 | Ineffective |
| crizotinib        | 84165.32 | Ineffective |
| curcumin          | 17500    | Ineffective |
| cyclopamine       | 425814.6 | Ineffective |
| doramapimod       | 554480   | Ineffective |
| epigallocatechin  | 166000   | Ineffective |
| erlotinib         | 109168.2 | Ineffective |
| gefitinib         | 16327.03 | Ineffective |
| genistein         | 89410    | Ineffective |
| GSK-650394        | 33002.79 | Ineffective |
| harmine           | 24000    | Ineffective |
| HSP90-inhibitor   | 19571.69 | Ineffective |
| HY-11007          | 77778.34 | Ineffective |
| IKK3-inhibitor-IX | 414343.8 | Ineffective |
| imatinib          | 97521.71 | Ineffective |
| KU-55933          | 101264.4 | Ineffective |
| lapatinib         | 104774.9 | Ineffective |
| lenalidomide      | 307372.6 | Ineffective |
| metformin         | 32700267 | Ineffective |
| methotrexate      | 15399.78 | Ineffective |
| MK-2206           | 12809.5  | Ineffective |
| motesanib         | 64428.02 | Ineffective |
| mycophenolic-acid | 10690    | Ineffective |
| navitoclax        | 53437.78 | Ineffective |
| nilotinib         | 100117.2 | Ineffective |
| NU-7441           | 21412.72 | Ineffective |
| olaparib          | 66171.24 | Ineffective |
| PAC-1             | 61639.26 | Ineffective |
| parthenolide      | 48984.54 | Ineffective |
| pazopanib         | 35958.63 | Ineffective |
| PD-173074         | 46078.77 | Ineffective |

|                |          |             |
|----------------|----------|-------------|
| PD-184352      | 11664.17 | Ineffective |
| PF-562271      | 10460.83 | Ineffective |
| PHA-665752     | 170164.1 | Ineffective |
| piperlongumine | 11130    | Ineffective |
| PLX-4720       | 131089.6 | Ineffective |
| pyrimethamine  | 655756.2 | Ineffective |
| QS-11          | 32602.47 | Ineffective |
| RO-3306        | 130460.9 | Ineffective |
| roscovitine    | 167901.1 | Ineffective |
| rucaparib      | 35722.04 | Ineffective |
| SB-216763      | 285569.2 | Ineffective |
| selumetinib    | 45596.15 | Ineffective |
| sorafenib      | 159882.3 | Ineffective |
| SYK-inhibitor  | 14185.47 | Ineffective |
| temozolomide   | 724500   | Ineffective |
| tipifarnib-P2  | 10127.17 | Ineffective |
| tozasertib     | 10076    | Ineffective |
| tretinoin      | 294287.8 | Ineffective |
| veliparib      | 306388.3 | Ineffective |
| VX-702         | 128809.7 | Ineffective |
| WH-4023        | 13159.99 | Ineffective |

Effective designated as IC50 < 10 µM and ineffective is designated as IC50 >= 10 µM
