# Supplementary material
Source: PubMed Central journal article supplement (PMC8807341)
Supplement: vdab192_suppl_supplementary_table_s3.pdf [file vdab192_suppl_supplementary_table_s3.pdf]

**Supplementary Table 3** Top 35 LINCS Compounds with sRGES < 0 and CNS-MPO >4 for GBM

(total)

|    | pert_id       | pert_iname    | sRGES      | CNS-MPO    |
|----|---------------|---------------|------------|------------|
| 1  | BRD-K24632043 | BRD-K24632043 | -0.3554117 | 4.55578571 |
| 2  | BRD-K57009782 | BRD-K57009782 | -0.3543382 | 4.45972356 |
| 3  | BRD-K69480620 | BRD-K69480620 | -0.3508831 | 5.0615     |
| 4  | BRD-K91491104 | BRD-K91491104 | -0.3436763 | 4.25735714 |
| 5  | BRD-K79027750 | BRD-K79027750 | -0.3399462 | 4.49980952 |
| 6  | BRD-K95607309 | BRD-K95607309 | -0.3365844 | 5.83333333 |
| 7  | BRD-K03958924 | BRD-K03958924 | -0.3354434 | 4.30227636 |
| 8  | BRD-K33385950 | BRD-K33385950 | -0.3350868 | 4.9795     |
| 9  | BRD-K55767450 | BRD-K55767450 | -0.3311678 | 4.50077059 |
| 10 | BRD-K88099061 | BRD-K88099061 | -0.3301118 | 5.80104762 |
| 11 | BRD-K24390300 | BRD-K24390300 | -0.3300774 | 4.50283333 |
| 12 | BRD-K51052187 | BRD-K51052187 | -0.3259654 | 4.60361905 |
| 13 | BRD-K32407455 | BRD-K32407455 | -0.3257089 | 4.13249605 |
| 14 | BRD-K94708051 | BRD-K94708051 | -0.3244087 | 5.07633333 |
| 15 | BRD-K72567746 | BRD-K72567746 | -0.3196508 | 4.89476265 |
| 16 | BRD-K98582396 | BRD-K98582396 | -0.3180644 | 4.09433333 |
| 17 | BRD-K80236176 | BRD-K80236176 | -0.3174398 | 4.67147619 |
| 18 | BRD-K85118298 | BRD-K85118298 | -0.3166808 | 5.5        |
| 19 | BRD-K36619075 | BRD-K36619075 | -0.3154395 | 5.35333333 |
| 20 | BRD-K11901011 | BRD-K11901011 | -0.3147748 | 4.25230952 |
| 21 | BRD-K68338581 | BRD-K68338581 | -0.3144874 | 4.70233333 |
| 22 | BRD-K73329392 | BRD-K73329392 | -0.3118298 | 4.53533333 |
| 23 | BRD-K61428915 | BRD-K61428915 | -0.3111606 | 4.38521429 |
| 24 | BRD-K51583960 | SA-1456443    | -0.3057857 | 4.90609524 |
| 25 | BRD-K36938987 | BRD-K36938987 | -0.3050647 | 5.32290476 |
| 26 | BRD-K41337261 | ZM-306416     | -0.3027616 | 4.38790837 |
| 27 | BRD-K70797508 | BRD-K70797508 | -0.3016716 | 4.83519048 |
| 28 | BRD-M91342002 | BRD-M91342002 | -0.3009996 | 4.682      |
| 29 | BRD-K21159035 | BRD-K21159035 | -0.2989657 | 5.24814286 |
| 30 | BRD-K48433912 | BRD-K48433912 | -0.2974983 | 5.68833333 |
| 31 | BRD-K24009388 | BRD-K24009388 | -0.2965511 | 5.16666667 |
| 32 | BRD-K36870972 | BRD-K36870972 | -0.2951344 | 4.09371429 |
| 33 | BRD-A24397426 | nadifloxacin  | -0.2933977 | 5.49728571 |
| 34 | BRD-K02130563 | panobinostat  | -0.2920889 | 4.495      |
| 35 | BRD-K11194815 | BRD-K11194815 | -0.2916889 | 4.49980952 |
